# Supplementary material for: Ventilator-associated pneumonia in critically ill patients with COVID-19
Source: Crit Care. 2021 Jan 11;25:25. doi: 10.1186/s13054-021-03460-5 (PMC7797892; doi:10.1186/s13054-021-03460-5)
Supplement: Supplementary file 1 — Additional file 1. Supplemental methods and results. [file 13054_2021_3460_MOESM1_ESM.pdf]

## **Ventilator-associated pneumonia in critically ill patients with COVID-19 -Supplemental material**

### **Supplemental methods**

#### *RNA/DNA extraction and SARS-CoV-2 qPCR*

500µl of BAL was subjected to RNA/DNA extraction following an existing method <sup>E1</sup>. Viscous samples were first treated with 10% v/v mucolysin, before 500µl lysis buffer (25mM Tris-HCL+ 4M Guanidine thiocyanate with 0.5% b-mercaptoethanol) and glass beads were added to each sample. Tubes were vortexed, and 100% analytical grade ethanol was added to a final concentration of 50%. After a 10 min incubation, 860µl of lysis buffer (containing MS2 bacteriophage as an internal extraction and amplification control) was added. This was then run over an RNA spin column as previously described <sup>E2</sup>. After validating the automated NUCLISENS easyMAG platform (Biomérieux, Marcy L'Etoile, France) for safe extraction sample processing was switched to this automated platform still using 500µl input sample and inclusion of the MS2 internal control SARS-CoV-2 specific real-time RT-PCR was performed and interpreted as previously described <sup>E2</sup>

#### *TaqMan multi-pathogen array*

Custom designed TaqMan Array Cards (TAC; Thermo Fisher Scientific) targeting 52 different common respiratory pathogens, were used to test for secondary infections as previously described <sup>E1</sup>. Fifty microlitres of extracted nucleic acid was used in a 200 µl final reaction volume with TaqMan™ Fast Virus 1-step Master Mix (Thermo Fisher Scientific), and cards were run on the QuantStudio 7 Flex platform (Thermo Fisher Scientific) as per the manufacturer's instructions. Detection of a clear exponential amplification curve with a Cycles to Threshold (CT) value  $\leq 32$  for any single gene target was reported as a positive result for the relevant pathogen. We have previously demonstrated that CT value of  $\leq 32$  corresponded to growth  $\geq 10^4$ /CFU/ml, hence the use of this threshold to define VAP <sup>E1</sup>.

### *16S Nanopore sequencing*

Extracted nucleic acids were concentrated using AMPure XP beads (Beckman Coulter) and 16S DNA libraries prepared using the 16S Barcoding Kit SQK-16S024 (Oxford Nanopore Technologies) as per the manufacturer's instructions. Final DNA libraries were loaded onto FLO-MIN106D R9.4.1 flow cells and sequencing was performed on a GridION Mk1 for ~36 hours with high accuracy basecalling enabled. The resulting fastq files were de-multiplexed with guppy\_barcode v3.6.0 using the --require\_barcodes\_both\_ends and --trim\_barcodes flags. Porechop v0.2.4 (<https://github.com/rrwick/Porechop>) was used to trim adapter and barcode sequences and Nanofilt v2.6.0 (De Coster, et. al., 2018) was used to filter the reads by length, 1,400 – 1,600 bps and a quality score of 10. Reads were classified against the Silva 132 99% Operational Taxonomic Units (OTUs) 16S database using Kraken2<sup>E3</sup>. Microbial diversity analyses were carried out in R using packages vegan<sup>E4</sup> and metacoder<sup>E5</sup>.

## Supplemental tables and figures

| Primary reason for admission        | number |
|-------------------------------------|--------|
| Abdominal surgical emergency        | 28     |
| Pneumonia/pneumonitis               | 23     |
| Liver transplantation               | 19     |
| Neurological emergency              | 13     |
| Hepatic failure                     | 12     |
| Post-Cardiac arrest                 | 12     |
| Trauma                              | 8      |
| Infection -other source             | 8      |
| Toxin ingestion                     | 6      |
| Vascular surgical emergency         | 6      |
| Cardiogenic shock/pulmonary oedema  | 3      |
| Other pathologies                   | 4      |
| Urinary tract infection/obstruction | 2      |

Table S1: primary admission categories for 144 patients admitted without COVID-19

| Parameter                                         | Covid (39) | Non-COVID (19) |
|---------------------------------------------------|------------|----------------|
| Median duration of ventilation prior to VAP (IQR) | 9 (6-13)   | 5 (4-9)        |
| (when diagnosed by bronchoscopy)                  | 8 (5-13)   | 5 (4-7)        |
| (when diagnosed by ETA)                           | 9 (6-14)   | 8 (3-12)       |
| % 'early' VAP (<96 hours of ventilation )         | 13%        | 33%            |
| Median P/F ratio at time of diagnosis (IQR)       | 17 (13-21) | 23 (17-25)     |
| Antibiotics in 72 hrs prior to diagnosis          | 83%        | 89%            |
| Antibiotics on day of sampling                    | 80%        | 89%            |
| % diagnosed by bronchoscopy                       | 20 (51%*)  | 10 (53%**)     |

\*4 cases not assessed by TAC due to lack of availability of laboratory capacity

\*\* 1 case not assessed by TAC due to lack of availability of laboratory capacity

Table S2: details of ventilator-associated pneumonias detected in patients with and without COVID-19

| Parameter                                                                        | COVID (n=64) | Non-COVID (n=48) | P value (z-test for proportions) |
|----------------------------------------------------------------------------------|--------------|------------------|----------------------------------|
| % of all patients                                                                | 79%          | 34%              | <0.0001                          |
| % microbiologically confirmed VAP                                                | 39 (61%)     | 19 (40%)         | 0.02                             |
| % investigated which met clinical and radiological VAP criteria (figure 1)       | 59 (92%)     | 39 (81)%         | 0.08                             |
| Median duration of ventilation prior to investigation for VAP (IQR)              | 7 (5-12)     | 6 (4-9)          | 0.06                             |
| Median P/F ratio at time of investigation (IQR)                                  | 18 (12-21)   | 23 (18-30)       | 0.0005                           |
| Antibiotics in 7 days prior to investigation                                     | 54 (84%)     | 45 (94%)         | 0.12                             |
| Antibiotics in 72 hrs prior to investigation                                     | 47 (74%)     | 40 (83%)         | 0.21                             |
| % investigated by bronchoscopy                                                   | 30 (47%*)    | 23 (48%**)       | 0.91                             |
| Incidence of microbiologically confirmed VAP by BAL                              | 20 (25%)     | 10 (7%)          | 0.0002                           |
| % of microbiologically confirmed VAP with new consolidation on CXR               | 26 (67%)     | 19 (100%)        | 0.004                            |
| % of microbiologically confirmed VAP with deteriorating diffuse shadowing on CXR | 13 (33%)     | 0 (0%)           | 0.004                            |

Table S3: Details of patients with and without COVID-19 investigated for suspected VAP

\*4 cases not assessed by TAC due to lack of availability of laboratory capacity

\*\* 1 case not assessed by TAC due to lack of availability of laboratory capacity

|                                    | <b>COVID</b> | <b>Non-COVID</b> |
|------------------------------------|--------------|------------------|
| Ceftriaxone                        | 0            | 1                |
| Ciprofloxacin                      | 3            | 8                |
| Co-amoxiclav                       | 13           | 10               |
| Cotrimoxazole                      | 0            | 1                |
| Clarithromycin                     | 7            | 1                |
| Meropenem                          | 10           | 11               |
| Metronidazole                      | 1            | 3                |
| Piperacillin/tazobactam            | 32           | 20               |
| Vancomycin                         | 5            | 5                |
| Antifungal (azole or echinocandin) | 1            | 4                |

Table S4: Antimicrobial exposure in the 7 days prior to investigation for VAP

| Parameter                                      | COVID-19<br>(n=81) | Non-COVID-19 (n=144) | Univariable P value | Adjusted P value in multivariable Cox model |
|------------------------------------------------|--------------------|----------------------|---------------------|---------------------------------------------|
| COVID                                          |                    |                      | <b>0.015</b>        | 0.045                                       |
| Median Age (IQR)                               | 62 (50-70)         | 62 (49-72)           | 0.986               | -                                           |
| Sex (% female)                                 | 31%                | 40%                  | <b>0.05</b>         | 0.123                                       |
| Hypertension                                   | 33%                | 33%                  | 0.349               | -                                           |
| Diabetes                                       | 22%                | 24%                  | 0.927               | -                                           |
| Obesity                                        | 37%                | 24%                  | 0.425               | -                                           |
| Chronic Kidney Disease                         | 12%                | 9%                   | 0.544               | -                                           |
| Chronic lung disease                           | 19%                | 24%                  | 0.175               | -                                           |
| Immunocompromised                              | 15%                | 25%                  | <b>0.038</b>        | 0.076                                       |
| Corticosteroid use in ICU                      | 16%                | 16%                  | 0.599               | -                                           |
| Median APACHE II (IQR)                         | 15 (11-19)         | 16 (12-20)           | 0.06                | -                                           |
| % with ARDS on ICU admission                   | 63 (78%)           | 22 (15%)             | 0.625               | -                                           |
| % ventilated prone                             | 40 (49%)           | 1 (0.7%)             | 0.18                | -                                           |
| Median P/F ratio in 24 hrs following admission | 18 (13-28)         | 34 (24-37)           | 0.301               | -                                           |
| Antibiotics in 24 hrs following admission      | 76 (94%)           | 126 (88%)            | 0.09                | -                                           |

Table S5: Variables evaluated for association with development of VAP in a Cox proportional hazards model with censoring for death and extubation. Variables were entered in a univariable fashion into the Cox model, and those with a p value of  $\leq 0.05$  were included in the final model, the adjusted p values from this final model shown in the right hand column.

| Patient    | Sample | SARS-CoV-2* | COVID-19** | Organism with Ct≤32                                                                | Cultured at ≥10 <sup>4</sup> CFU/ml      | VAP |
|------------|--------|-------------|------------|------------------------------------------------------------------------------------|------------------------------------------|-----|
| Patient 1  | 1      | POS         | YES        | <i>S. aureus</i>                                                                   | No significant growth                    | YES |
|            | 2      | POS         | YES        | <i>S. maltophilia</i>                                                              | No significant growth                    | YES |
| Patient 2  | 1      | POS         | YES        | <i>H. influenzae</i>                                                               | No significant growth                    | YES |
| Patient 3  | 1      | POS         | YES        | <i>K. pneumoniae</i> , <i>S. marcescens</i> , <i>E. coli</i> <i>S. epidermidis</i> | No significant growth                    | YES |
| Patient 4  | 1      | POS         | YES        | <i>P. aeruginosa</i>                                                               | No significant growth                    | NO  |
|            | 2      | POS         | YES        | <i>P. aeruginosa</i>                                                               | <i>P. aeruginosa</i>                     | YES |
| Patient 5  | 1      | POS         | YES        | <i>HSV</i> , <i>S. epidermidis</i> , <i>C. albicans</i>                            | <i>C. albicans</i>                       | NO  |
|            | 1      | POS         | YES        | <i>S. aureus</i> , <i>S. epidermidis</i> , <i>Streptococcus</i> spp                | <i>S. aureus</i>                         | YES |
| Patient 6  | 2      | POS         | YES        | <i>S. aureus</i> , <i>E. faecium</i> , <i>S. marcescens</i>                        | <i>S. aureus</i>                         | YES |
|            | 3      | POS         | YES        | <i>S. aureus</i> , <i>E. faecium</i> , <i>HSV</i>                                  | <i>S. aureus</i> , <i>S. maltophilia</i> | YES |
| Patient 7  | 1      | POS         | YES        | <i>E. faecium</i> , <i>S. epidermidis</i>                                          | Mixed upper resp. tract flora            | NO  |
| Patient 8  | 1      | POS         | YES        | <i>E. faecium</i> , <i>C. albicans</i>                                             | <i>C. albicans</i>                       | NO  |
| Patient 9  | 1      | POS         | YES        | <i>HSV</i> , <i>S. marcescens</i> ,                                                | <i>S. marcescens</i>                     | YES |
|            | 2      | POS         | YES        | <i>E. faecium</i> , <i>S. marcescens</i>                                           | No significant growth                    | YES |
| Patient 10 | 1      | POS         | YES        | <i>K. pneumoniae</i>                                                               | No significant growth                    | YES |
| Patient 11 | 1      | POS         | YES        | <i>A. fumigatus</i> , <i>S. maltophilia</i>                                        | No significant growth                    | NO  |
| Patient 12 | 1      | POS         | YES        |                                                                                    | <i>S. maltophilia</i>                    | YES |
| Patient 13 | 1      | POS         | YES        |                                                                                    | No significant growth                    | NO  |
|            | 1      | POS         | YES        |                                                                                    | No significant growth                    | NO  |
| Patient 14 | 2      | NEG         | YES        | <i>K. pneumoniae</i>                                                               | <i>K. pneumoniae</i>                     | YES |
|            | 3      | NEG         | YES        | <i>K. pneumoniae</i>                                                               | <i>K. pneumoniae</i>                     | YES |
| Patient 15 | 1      | NEG         | NO         | <i>C. albicans</i>                                                                 | <i>C. albicans</i>                       | NO  |
| Patient 16 | 1      | NEG         | NO         | <i>E. coli</i>                                                                     | <i>E. coli</i>                           | YES |
| Patient 17 | 1      | NEG         | NO         | <i>S. marcescens</i>                                                               | <i>Serratia marcescens</i>               | YES |
| Patient 18 | 1      | NEG         | YES        | <i>Streptococcus</i> spp, <i>E. Proteus</i> , <i>K. pneumoniae</i>                 | No significant growth                    | YES |
| Patient 19 | 1      | NEG         | YES        | <i>E. faecium</i> , <i>E. coli</i>                                                 | <i>E. coli</i>                           | YES |
| Patient 20 | 1      | NEG         | YES        | <i>Enterobacteriaceae</i>                                                          | No significant growth                    | YES |
| Patient 21 | 1      | NEG         | NO         | <i>Streptococcus</i> spp, <i>H. influenzae</i>                                     | No significant growth                    | YES |
| Patient 22 | 1      | NEG         | NO         | <i>H. influenzae</i> , <i>Streptococcus</i> spp, <i>S. aureus</i>                  | No significant growth                    | YES |
| Patient 23 | 1      | NEG         | NO         |                                                                                    | No significant growth                    | NO  |
|            | 2      | NEG         | NO         |                                                                                    | No significant growth                    | NO  |
| Patient 24 | 1      | NEG         | NO         | <i>HSV</i>                                                                         | No significant growth                    | NO  |
|            | 2      | NEG         | NO         | <i>HSV</i>                                                                         | No significant growth                    | NO  |
| Patient 25 | 1      | NEG         | YES        |                                                                                    | No significant growth                    | NO  |

Table S4: details of the organisms detected by TagMan array and culture in the patients included in the 16s sequencing sub-study. \* positive for SARS-CoV-2 by PCR at time of sampling, \*\* admitted to ICU with COVID-19 confirmed by SARS-CoV-2 PCR.

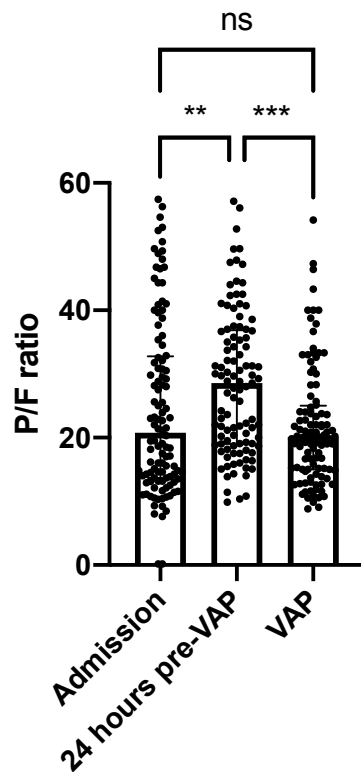

**Figure S1: P/F ratio in patients investigated for suspected VAP at ICU admission, 24 hours prior to investigation for VAP and on day of investigation for VAP.  $P < 0.0001$  by Kruskal-Wallis, \*\*  $P = 0.0019$ , \*\*\*  $P < 0.0001$ , NS  $p = 0.99$  by Dunn's post-hoc test.**

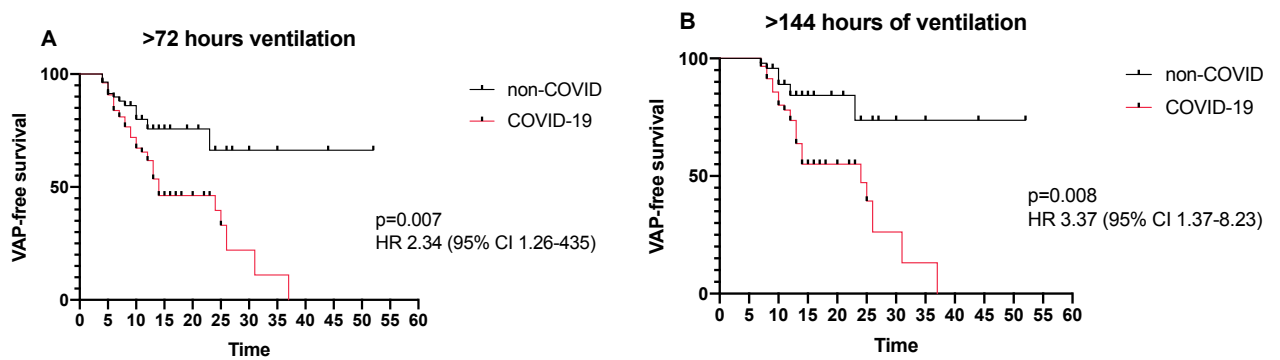

**Figure S2: Survival curves for subsets of patients ventilated for at least 72 hours (A) and at least 144 hours (B). HR, hazard ratio. P values by Cox proportional hazards model**

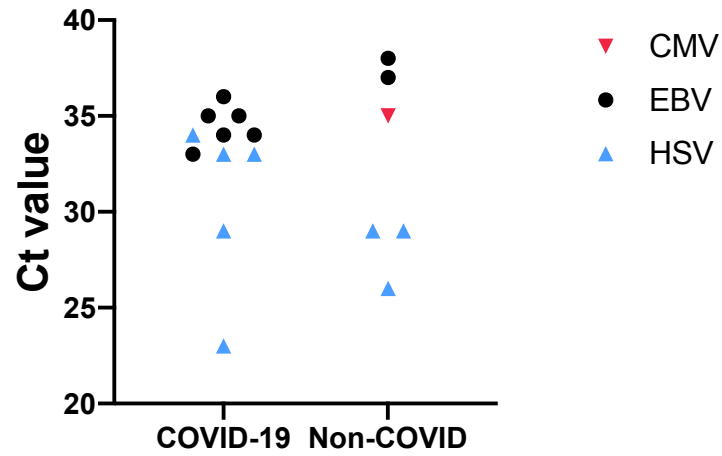

**Figure S3: Cycles to crossing threshold (Ct) for herpesvirade detected on the TAC in bronchoalveolar lavage from patients with and without COVID-19.** CMV -cytomegalovirus, EBV-Epstein-Barr virus, HSV-herpes-simplex virus. From 15 patients with positive detection (2 patients had detection of both HSV and EBV).

## Supplemental references

- E1 Navapurkar V, Bartholdson-Scott J, Maes M, et al. Development and implementation of a customised rapid syndromic diagnostic test for severe pneumonia. medRxiv. June 2020:1-21. doi:10.1101/2020.06.02.20118489.
- E2 Rivett L, Sridhar S, Sparkes D, et al. Screening of healthcare workers for SARS-CoV-2 highlights the role of asymptomatic carriage in COVID-19 transmission. Elife. 2020;9. doi:10.7554/eLife.58728.
- E3 Wood DE, Lu J, Ben Langmead. Improved metagenomic analysis with Kraken 2. Geneome Biol. 2019:1-13.
- E4 Oksanen, J. (2013). Vegan: ecological diversity. R Project.
- E5 Foster ZSL, Sharpton TJ, Grünwald NJ. Metacoder: An R package for visualization and manipulation of community taxonomic diversity data. Poisot T, ed. PLoS Comput Biol. 2017;13(2):e1005404-e1005415.
